# Supplementary material
Source: PubMed Central journal article supplement (PMC4761491)
Supplement: NIHMS750392-supplement-1.pdf [file NIHMS750392-supplement-1.pdf]

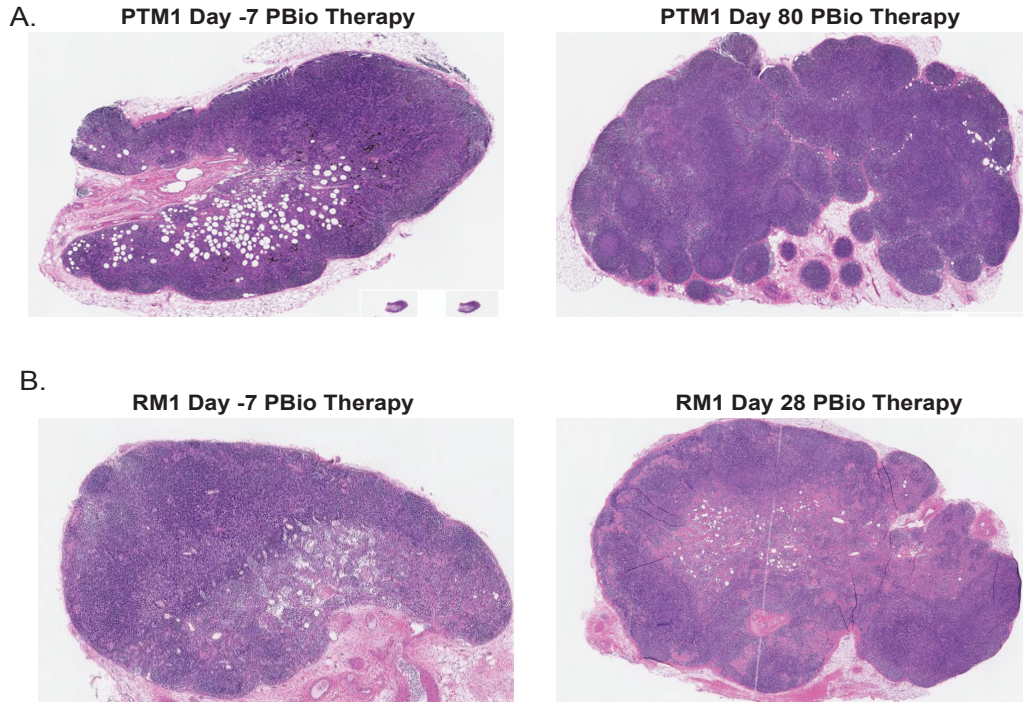

**Supplemental Figure 1.** Representative hematoxylin and eosin (H&E) staining of LN tissue in one PTM and one RM pre-PBio therapy (left panels) and post-PBio therapy (right panels). H&E staining and immunohistochemical analysis of LN tissues was performed using standard immunohistochemical staining techniques, as previously described (1).

1. Evans, T. I., H. Li, J. L. Schafer, N. R. Klatt, X. P. Hao, R. P. Traslavina, J. D. Estes, J. M. Brenchley, and R. K. Reeves. 2015. SIV-induced Translocation of Bacterial Products in the Liver Mobilizes Myeloid Dendritic and Natural Killer Cells Associated With Liver Damage. *The Journal of infectious diseases*.
